# Supplementary material
Source: bioRxiv or medRxiv preprint supplement (https://medrxiv.org/content/medrxiv/early/2020/12/24/2020.12.23.20248671/DC1/embed/media-1.pdf)
Supplement: Supplementary file [file media-1.pdf]

**Hydrating the Respiratory Tract: An Alternative Explanation Why Masks Lower Severity  
of COVID-19 Disease**

Joseph M. Courtney and Ad Bax

Laboratory of Chemical Physics, NIDDK,

National Institutes of Health, Bethesda, MD, 20892-0520, USA

**Supporting Material**

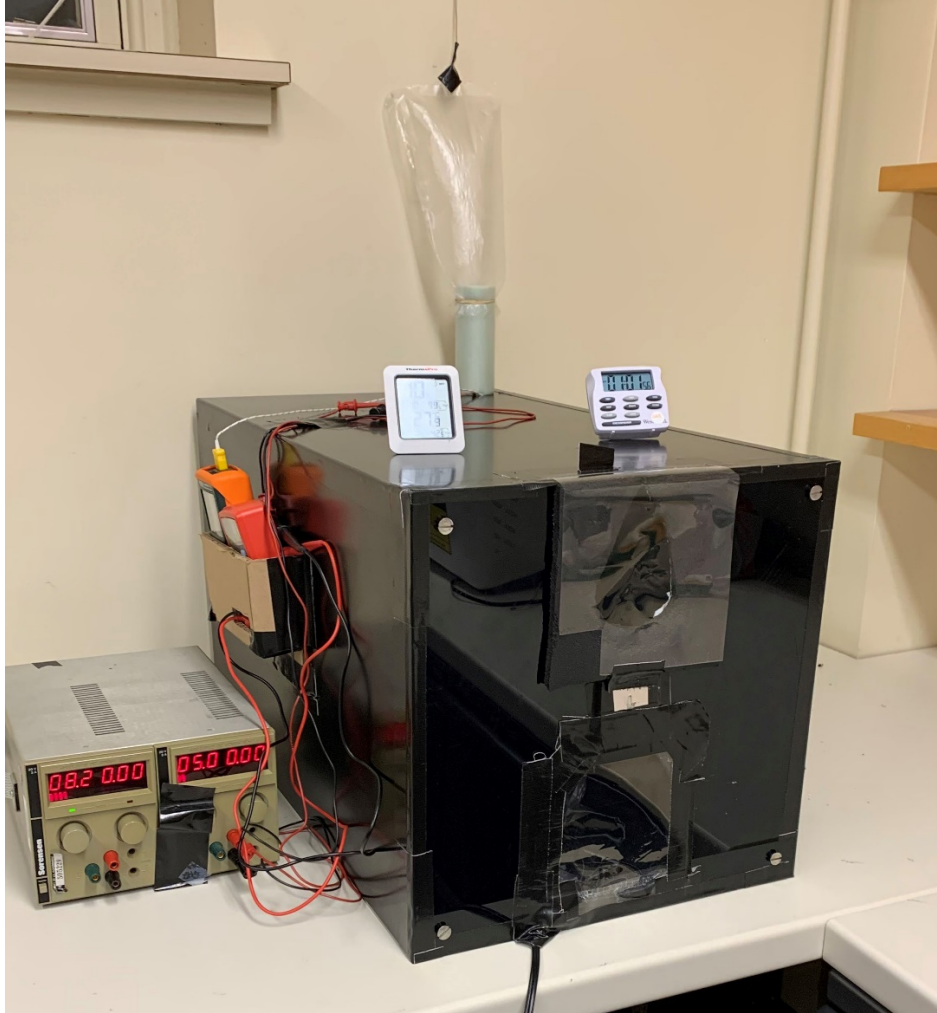

**FIGURE S1.** Breathing chamber used for humidity measurements. The steel chamber has a plastic front panel with two sealable openings. The upper opening is shaped to optimally fit the face of the volunteer and is lined with high density foam rubber to make a tight seal with the face. For purging the chamber, a fan is mounted outside the chamber in front of the bottom hole. The polyethylene bag at the top of the box is connected to the interior by a short piece of high-density pipe insulation and accommodates the change in gas volume associated with breathing into the box. Thermocouple and temperature sensor leads enter the chamber along the flexible pipe insulation.

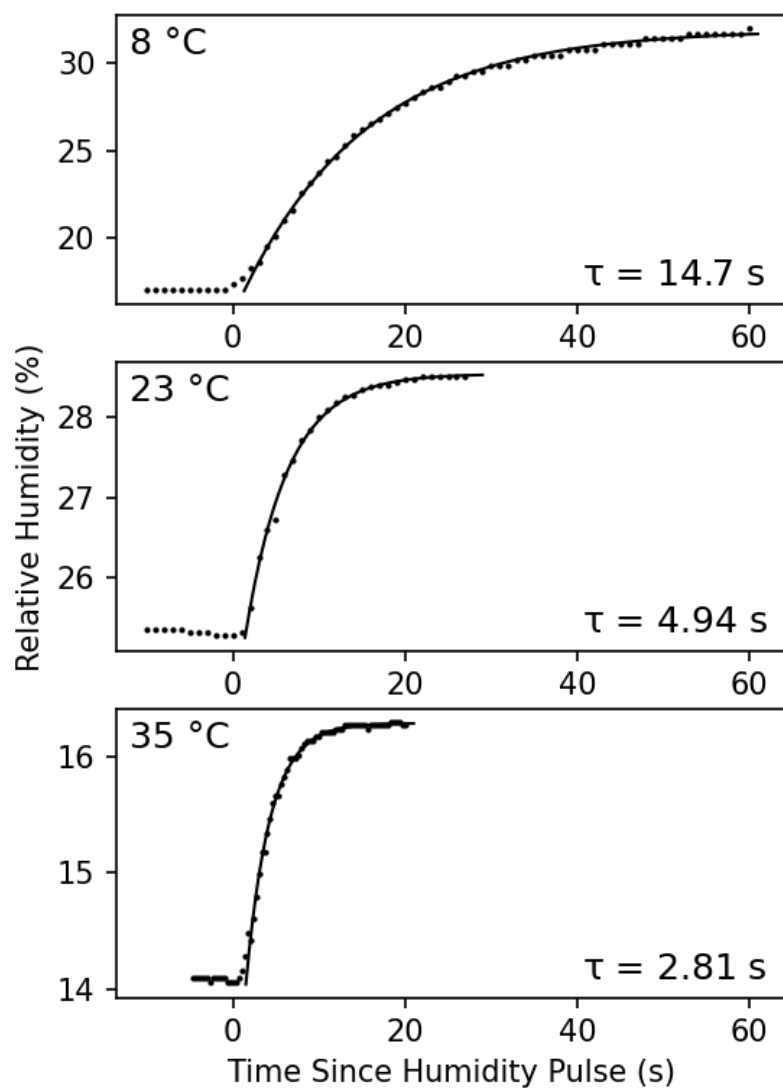

**FIGURE S2.** Humidity sensor response to a step-increase in humidity at time zero, recorded at three different temperatures. The solid lines correspond to mono-exponential fits to the step-elevated humidity of the chamber, preceded by a 1.4-s delay that is attributed to the time required for mixing of the air by the internal fan. The time constants are indicated in each panel.

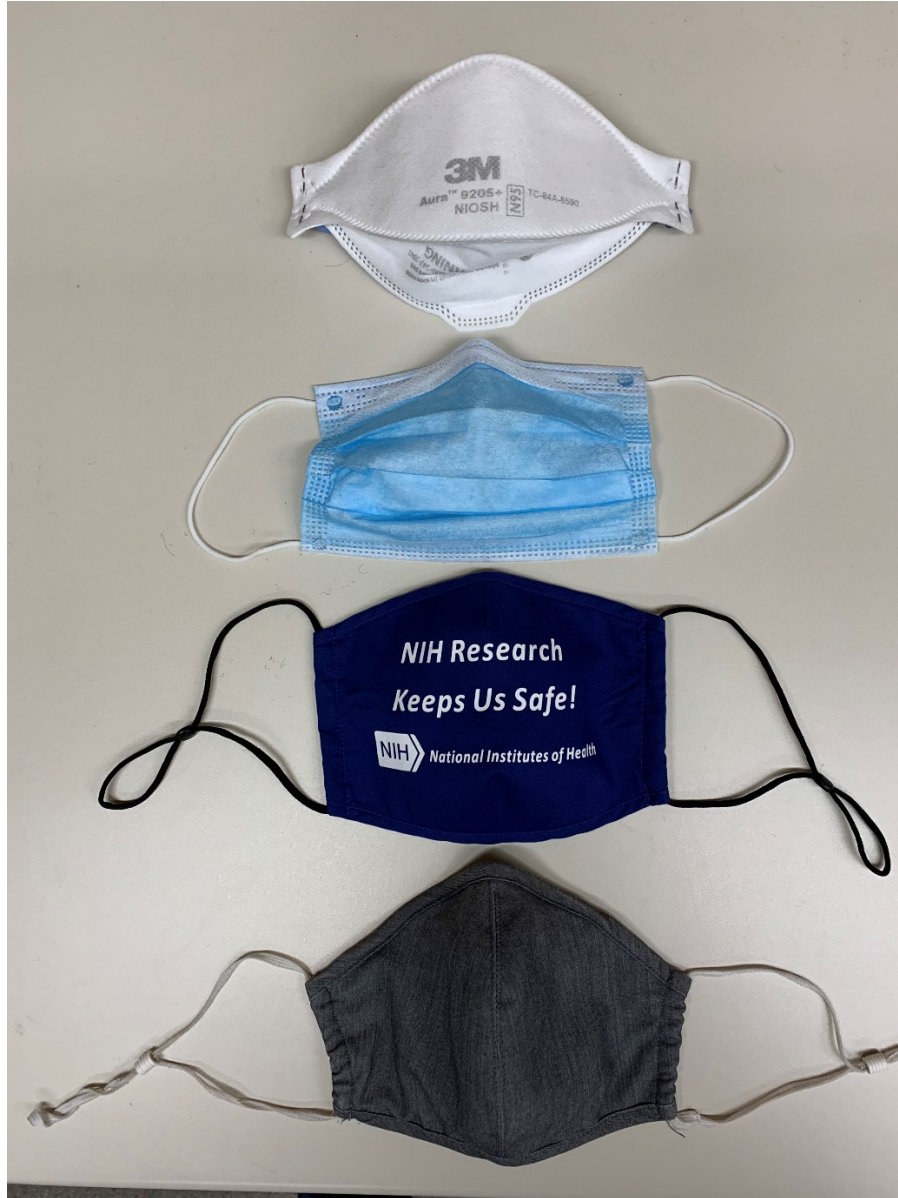

**FIGURE S3.** Four masks used for humidity measurements. From to top bottom: 3M 9205 N95 mask; NIH stockroom surgical mask; NIH stockroom polyester-cotton blend two-ply cloth mask; double-ply 100% cotton mask, purchased online from <https://mandalascrubs.com/products/face-mask>

**TABLE S2.** Temperature and humidity sensor readings before and after pseudo-tidal breathing. Voltages and temperatures after breathing were taken after stabilization.

| <b>MASK</b>  | <b>LOCATION</b> | <b>RUN</b> | <b>TEMPERATURE<br/>(°C) BEFORE</b> | <b>SENSOR VOLTAGE<br/>(V) BEFORE</b> | <b>TEMPERATURE<br/>(°C) AFTER</b> | <b>SENSOR VOLTAGE<br/>(V) AFTER</b> |
|--------------|-----------------|------------|------------------------------------|--------------------------------------|-----------------------------------|-------------------------------------|
| NONE         | cold room       | 1          | 7.7                                | 1.20                                 | 7.8                               | 2.35                                |
| NONE         | cold room       | 2          | 7.7                                | 1.20                                 | 7.8                               | 2.30                                |
| NONE         | cold room       | 3          | 7.7                                | 1.20                                 | 7.8                               | 2.35                                |
| SURGICAL     | cold room       | 1          | 7.7                                | 1.20                                 | 7.8                               | 1.96                                |
| SURGICAL     | cold room       | 4          | 7.7                                | 1.20                                 | 7.6                               | 1.92                                |
| SURGICAL     | cold room       | 5          | 7.7                                | 1.20                                 | 7.6                               | 1.94                                |
| LIGHT CLOTH  | cold room       | 1          | 7.7                                | 1.20                                 | 7.6                               | 1.91                                |
| LIGHT CLOTH  | cold room       | 2          | 7.7                                | 1.20                                 | 7.6                               | 1.90                                |
| LIGHT CLOTH  | cold room       | 3          | 7.7                                | 1.20                                 | 7.8                               | 1.89                                |
| N95          | cold room       | 1          | 7.7                                | 1.20                                 | 7.8                               | 1.8                                 |
| N95          | cold room       | 2          | 7.7                                | 1.20                                 | 7.9                               | 1.81                                |
| N95          | cold room       | 3          | 7.7                                | 1.20                                 | 7.8                               | 1.78                                |
| HEAVY COTTON | cold room       | 4          | 7.3                                | 1.20                                 | 7.2                               | 1.55                                |
| HEAVY COTTON | cold room       | 2          | 7.7                                | 1.20                                 | 7.8                               | 1.57                                |
| HEAVY COTTON | cold room       | 3          | 7.7                                | 1.20                                 | 7.9                               | 1.55                                |
| NONE         | office          | 2          | 22.3                               | 1.62                                 | 22.9                              | 2.32                                |
| NONE         | office          | 3          | 22.1                               | 1.61                                 | 22.65                             | 2.335                               |
| NONE         | office          | 4          | 22.1                               | 1.62                                 | 22.6                              | 2.33                                |
| SURGICAL     | office          | 1          | 22.1                               | 1.62                                 | 22.6                              | 2.20                                |
| SURGICAL     | office          | 2          | 22.1                               | 1.62                                 | 22.6                              | 2.21                                |
| SURGICAL     | office          | 3          | 22.1                               | 1.62                                 | 22.4                              | 2.20                                |
| LIGHT CLOTH  | office          | 1          | 22.1                               | 1.62                                 | 22.4                              | 2.105                               |
| LIGHT CLOTH  | office          | 2          | 22.1                               | 1.61                                 | 22.6                              | 2.11                                |
| LIGHT CLOTH  | office          | 3          | 22.1                               | 1.61                                 | 22.6                              | 2.11                                |
| N95          | office          | 1          | 22.1                               | 1.61                                 | 22.6                              | 2.09                                |
| N95          | office          | 4          | 22.2                               | 1.61                                 | 22.4                              | 2.09                                |
| N95          | office          | 5          | 22.0                               | 1.61                                 | 22.4                              | 2.09                                |
| HEAVY COTTON | office          | 2          | 21.9                               | 1.61                                 | 22.4                              | 1.95                                |
| HEAVY COTTON | office          | 3          | 22.1                               | 1.61                                 | 22.5                              | 1.90                                |
| HEAVY COTTON | office          | 4          | 22.0                               | 1.60                                 | 22.4                              | 1.95                                |
| NONE         | hot room        | 1          | 38.4                               | 1.20                                 | 38.6                              | 1.53                                |
| NONE         | hot room        | 2          | 37.5                               | 1.20                                 | 37.9                              | 1.52                                |
| NONE         | hot room        | 3          | 37.9                               | 1.20                                 | 37.9                              | 1.52                                |
| SURGICAL     | hot room        | 1          | 37.7                               | 1.21                                 | 38.2                              | 1.43                                |
| SURGICAL     | hot room        | 2          | 37.6                               | 1.21                                 | 38.2                              | 1.44                                |
| SURGICAL     | hot room        | 4          | 37.2                               | 1.20                                 | 37.7                              | 1.45                                |

|                     |          |   |      |      |      |      |
|---------------------|----------|---|------|------|------|------|
| <b>LIGHT CLOTH</b>  | hot room | 2 | 37.2 | 1.20 | 37.3 | 1.39 |
| <b>LIGHT CLOTH</b>  | hot room | 3 | 37.2 | 1.20 | 37.9 | 1.37 |
| <b>LIGHT CLOTH</b>  | hot room | 4 | 37.2 | 1.21 | 37.6 | 1.40 |
| <b>N95</b>          | hot room | 1 | 37.4 | 1.21 | 37.6 | 1.45 |
| <b>N95</b>          | hot room | 2 | 37.0 | 1.21 | 37.4 | 1.44 |
| <b>N95</b>          | hot room | 3 | 37.1 | 1.20 | 37.2 | 1.44 |
| <b>HEAVY COTTON</b> | hot room | 1 | 37.0 | 1.21 | 37.5 | 1.33 |
| <b>HEAVY COTTON</b> | hot room | 2 | 37.4 | 1.20 | 37.4 | 1.33 |
| <b>HEAVY COTTON</b> | hot room | 3 | 37.5 | 1.02 | 37.7 | 1.33 |
